# Supplementary material
Source: PubMed Central journal article supplement (PMC7483239)
Supplement: NIHMS1558796-supplement-Supp1.pdf [file NIHMS1558796-supplement-Supp1.pdf]

**Supplementary File 1. Database sources for autism-associated genes**

| Gene name       | Developmental Brain Disorder gene database (Tier 1) | denovo-db database (>5 non-SSC mutations) | SFARI Gene database (Tiers 1 and 2) |
|-----------------|-----------------------------------------------------|-------------------------------------------|-------------------------------------|
| <i>ADNP</i>     | X                                                   | X                                         | X                                   |
| <i>AHDC1</i>    | X                                                   |                                           |                                     |
| <i>ANK2</i>     | X                                                   | X                                         | X                                   |
| <i>ANKRD11</i>  | X                                                   | X                                         | X                                   |
| <i>ARID1B</i>   | X                                                   | X                                         | X                                   |
| <i>ARL6IP4</i>  |                                                     | X                                         |                                     |
| <i>ASH1L</i>    | X                                                   | X                                         | X                                   |
| <i>ASXL3</i>    | X                                                   | X                                         | X                                   |
| <i>AUTS2</i>    | X                                                   |                                           |                                     |
| <i>BAZ2B</i>    |                                                     |                                           | X                                   |
| <i>BCKDK</i>    |                                                     |                                           | X                                   |
| <i>BCL11A</i>   | X                                                   | X                                         | X                                   |
| <i>BCLAF1</i>   | X                                                   |                                           |                                     |
| <i>BRF1</i>     |                                                     | X                                         |                                     |
| <i>BRSK2</i>    |                                                     | X                                         |                                     |
| <i>CACNA1D</i>  |                                                     |                                           | X                                   |
| <i>CACNA1H</i>  |                                                     |                                           | X                                   |
| <i>CACNA2D3</i> |                                                     |                                           | X                                   |
| <i>CALU</i>     |                                                     | X                                         |                                     |
| <i>CASZ1</i>    |                                                     | X                                         |                                     |
| <i>CD101</i>    |                                                     | X                                         |                                     |
| <i>CDKL5</i>    | X                                                   |                                           |                                     |
| <i>CELF2</i>    |                                                     | X                                         |                                     |
| <i>CEP41</i>    |                                                     |                                           | X                                   |
| <i>CHAMP1</i>   | X                                                   |                                           |                                     |
| <i>CHD2</i>     | X                                                   | X                                         | X                                   |
| <i>CHD3</i>     |                                                     | X                                         |                                     |
| <i>CHD7</i>     | X                                                   | X                                         |                                     |
| <i>CHD8</i>     | X                                                   | X                                         | X                                   |
| <i>CIC</i>      | X                                                   |                                           | X                                   |
| <i>CNOT3</i>    | X                                                   |                                           | X                                   |
| <i>CNTN4</i>    |                                                     |                                           | X                                   |
| <i>CNTNAP2</i>  |                                                     |                                           | X                                   |
| <i>CREBBP</i>   | X                                                   |                                           |                                     |
| <i>CTBP2</i>    |                                                     | X                                         |                                     |
| <i>CTCF</i>     | X                                                   |                                           |                                     |
| <i>CTNNB1</i>   | X                                                   |                                           |                                     |

| Gene name       | Developmental Brain Disorder gene database (Tier 1) | denovo-db database (>5 non-SSC mutations) | SFARI Gene database (Tiers 1 and 2) |
|-----------------|-----------------------------------------------------|-------------------------------------------|-------------------------------------|
| <i>CTNND2</i>   |                                                     |                                           | X                                   |
| <i>CUL3</i>     | X                                                   | X                                         | X                                   |
| <i>CUX1</i>     |                                                     |                                           | X                                   |
| <i>DDX3X</i>    | X                                                   | X                                         | X                                   |
| <i>DEAF1</i>    |                                                     |                                           | X                                   |
| <i>DHX57</i>    | X                                                   |                                           |                                     |
| <i>DIP2C</i>    |                                                     |                                           | X                                   |
| <i>DMD</i>      | X                                                   |                                           |                                     |
| <i>DNM1L</i>    |                                                     | X                                         |                                     |
| <i>DNMT3A</i>   | X                                                   |                                           |                                     |
| <i>DOCK8</i>    |                                                     | X                                         |                                     |
| <i>DPP6</i>     | X                                                   |                                           |                                     |
| <i>DPYD</i>     | X                                                   |                                           |                                     |
| <i>DSCAM</i>    | X                                                   | X                                         | X                                   |
| <i>DYRK1A</i>   | X                                                   | X                                         | X                                   |
| <i>DYSF</i>     |                                                     | X                                         |                                     |
| <i>EFTUD2</i>   | X                                                   |                                           |                                     |
| <i>ENO3</i>     |                                                     | X                                         |                                     |
| <i>EP300</i>    |                                                     | X                                         |                                     |
| <i>ERBIN</i>    |                                                     | X                                         | X                                   |
| <i>FOXP1</i>    | X                                                   |                                           | X                                   |
| <i>GABRB3</i>   |                                                     | X                                         | X                                   |
| <i>GIGYF2</i>   |                                                     |                                           | X                                   |
| <i>GRIA1</i>    |                                                     |                                           | X                                   |
| <i>GRIA2</i>    |                                                     | X                                         |                                     |
| <i>GRIN2B</i>   | X                                                   |                                           | X                                   |
| <i>GRIP1</i>    |                                                     |                                           | X                                   |
| <i>HHAT</i>     |                                                     | X                                         |                                     |
| <i>HIVEP2</i>   | X                                                   |                                           |                                     |
| <i>HIVEP3</i>   |                                                     | X                                         |                                     |
| <i>IL1RAPL1</i> | X                                                   |                                           |                                     |
| <i>ILF2</i>     |                                                     |                                           | X                                   |
| <i>INSC</i>     |                                                     | X                                         |                                     |
| <i>INTS6</i>    |                                                     |                                           | X                                   |
| <i>IQSEC2</i>   | X                                                   |                                           |                                     |
| <i>IRF2BPL</i>  |                                                     |                                           | X                                   |
| <i>ITSN1</i>    | X                                                   |                                           |                                     |
| <i>KANSL1</i>   | X                                                   |                                           |                                     |
| <i>KAT2B</i>    |                                                     |                                           | X                                   |

| Gene name      | Developmental Brain Disorder gene database (Tier 1) | denovo-db database (>5 non-SSC mutations) | SFARI Gene database (Tiers 1 and 2) |
|----------------|-----------------------------------------------------|-------------------------------------------|-------------------------------------|
| <i>KAT6A</i>   | X                                                   |                                           |                                     |
| <i>KATNAL2</i> |                                                     |                                           | X                                   |
| <i>KCNQ2</i>   | X                                                   | X                                         |                                     |
| <i>KDM5B</i>   | X                                                   | X                                         | X                                   |
| <i>KDM6A</i>   | X                                                   |                                           | X                                   |
| <i>KIF11</i>   | X                                                   |                                           |                                     |
| <i>KMT2A</i>   | X                                                   | X                                         | X                                   |
| <i>KMT2C</i>   | X                                                   | X                                         | X                                   |
| <i>KMT5B</i>   |                                                     | X                                         | X                                   |
| <i>LEO1</i>    |                                                     |                                           | X                                   |
| <i>LMTK3</i>   | X                                                   |                                           |                                     |
| <i>MACROD2</i> |                                                     |                                           | X                                   |
| <i>MAGEL2</i>  | X                                                   |                                           | X                                   |
| <i>MAPK9</i>   |                                                     | X                                         |                                     |
| <i>MBD5</i>    | X                                                   |                                           |                                     |
| <i>MBOAT7</i>  |                                                     |                                           | X                                   |
| <i>MECP2</i>   | X                                                   | X                                         | X                                   |
| <i>MED13</i>   |                                                     |                                           | X                                   |
| <i>MED13L</i>  | X                                                   |                                           | X                                   |
| <i>MEF2C</i>   | X                                                   |                                           |                                     |
| <i>MET</i>     |                                                     |                                           | X                                   |
| <i>MYT1L</i>   | X                                                   | X                                         | X                                   |
| <i>NAA15</i>   |                                                     | X                                         | X                                   |
| <i>NCKAP1</i>  | X                                                   |                                           | X                                   |
| <i>NCOR1</i>   |                                                     |                                           | X                                   |
| <i>NEXMIF</i>  | X                                                   | X                                         |                                     |
| <i>NLGN3</i>   |                                                     |                                           | X                                   |
| <i>NRXN1</i>   | X                                                   | X                                         | X                                   |
| <i>NSD1</i>    | X                                                   | X                                         |                                     |
| <i>NSD2</i>    |                                                     | X                                         |                                     |
| <i>OXR1</i>    |                                                     | X                                         |                                     |
| <i>PAX5</i>    |                                                     | X                                         |                                     |
| <i>PCDH11X</i> |                                                     | X                                         |                                     |
| <i>PCDH19</i>  | X                                                   |                                           |                                     |
| <i>PDE11A</i>  |                                                     | X                                         |                                     |
| <i>PHF12</i>   |                                                     | X                                         |                                     |
| <i>PHF3</i>    |                                                     |                                           | X                                   |
| <i>PHIP</i>    | X                                                   |                                           |                                     |
| <i>POGZ</i>    | X                                                   | X                                         | X                                   |

| Gene name      | Developmental Brain Disorder gene database (Tier 1) | denovo-db database (>5 non-SSC mutations) | SFARI Gene database (Tiers 1 and 2) |
|----------------|-----------------------------------------------------|-------------------------------------------|-------------------------------------|
| <i>PRKAR1B</i> |                                                     | X                                         |                                     |
| <i>PRMT2</i>   |                                                     | X                                         |                                     |
| <i>PTCHD1</i>  | X                                                   |                                           | X                                   |
| <i>PTEN</i>    | X                                                   |                                           | X                                   |
| <i>QRICH1</i>  |                                                     | X                                         |                                     |
| <i>RAI1</i>    | X                                                   |                                           |                                     |
| <i>RANBP17</i> |                                                     |                                           | X                                   |
| <i>RB1CC1</i>  | X                                                   |                                           |                                     |
| <i>RELN</i>    |                                                     |                                           | X                                   |
| <i>RIMS1</i>   | X                                                   |                                           | X                                   |
| <i>RPH3A</i>   | X                                                   |                                           |                                     |
| <i>SATB2</i>   | X                                                   |                                           |                                     |
| <i>SCN1A</i>   | X                                                   | X                                         |                                     |
| <i>SCN2A</i>   | X                                                   | X                                         | X                                   |
| <i>SCN9A</i>   |                                                     |                                           | X                                   |
| <i>SET</i>     |                                                     | X                                         | X                                   |
| <i>SETBP1</i>  | X                                                   |                                           |                                     |
| <i>SETD2</i>   | X                                                   |                                           |                                     |
| <i>SETD5</i>   | X                                                   | X                                         | X                                   |
| <i>SHANK2</i>  | X                                                   |                                           | X                                   |
| <i>SHANK3</i>  | X                                                   | X                                         | X                                   |
| <i>SLC12A6</i> |                                                     | X                                         |                                     |
| <i>SLC6A1</i>  | X                                                   | X                                         | X                                   |
| <i>SLC9A6</i>  | X                                                   |                                           |                                     |
| <i>SMARCC2</i> |                                                     | X                                         | X                                   |
| <i>SMC1A</i>   | X                                                   |                                           |                                     |
| <i>SOX5</i>    | X                                                   | X                                         |                                     |
| <i>SPAST</i>   |                                                     |                                           | X                                   |
| <i>SPRED2</i>  |                                                     | X                                         |                                     |
| <i>SRCAP</i>   | X                                                   | X                                         | X                                   |
| <i>SRRM2</i>   |                                                     | X                                         |                                     |
| <i>SRSF11</i>  |                                                     | X                                         | X                                   |
| <i>ST3GAL6</i> |                                                     | X                                         |                                     |
| <i>STAU1</i>   |                                                     | X                                         |                                     |
| <i>STXBP1</i>  | X                                                   | X                                         |                                     |
| <i>SYNGAP1</i> | X                                                   | X                                         | X                                   |
| <i>TAOK2</i>   |                                                     |                                           | X                                   |
| <i>TBL1XR1</i> |                                                     |                                           | X                                   |
| <i>TBR1</i>    | X                                                   |                                           | X                                   |

| Gene name      | Developmental Brain Disorder gene database (Tier 1) | denovo-db database (>5 non-SSC mutations) | SFARI Gene database (Tiers 1 and 2) |
|----------------|-----------------------------------------------------|-------------------------------------------|-------------------------------------|
| <i>TCF12</i>   |                                                     | X                                         |                                     |
| <i>TCF20</i>   | X                                                   | X                                         | X                                   |
| <i>TCF4</i>    | X                                                   | X                                         |                                     |
| <i>TNRC6B</i>  |                                                     |                                           | X                                   |
| <i>TRIO</i>    | X                                                   |                                           | X                                   |
| <i>TRIP12</i>  |                                                     | X                                         | X                                   |
| <i>TTN</i>     |                                                     | X                                         |                                     |
| <i>UBE3A</i>   | X                                                   |                                           |                                     |
| <i>UBN2</i>    |                                                     |                                           | X                                   |
| <i>UPF3B</i>   |                                                     | X                                         | X                                   |
| <i>USP15</i>   |                                                     |                                           | X                                   |
| <i>USP7</i>    |                                                     |                                           | X                                   |
| <i>WAC</i>     | X                                                   | X                                         | X                                   |
| <i>WDFY3</i>   | X                                                   |                                           | X                                   |
| <i>WDR45</i>   | X                                                   |                                           |                                     |
| <i>ZC3H14</i>  |                                                     | X                                         |                                     |
| <i>ZFAND5</i>  |                                                     | X                                         |                                     |
| <i>ZMYND11</i> | X                                                   |                                           |                                     |
| <i>ZNF462</i>  | X                                                   |                                           |                                     |
