# Supplementary material
Source: PubMed Central journal article supplement (PMC7483239)
Supplement: NIHMS1558796-supplement-Supp2.pdf [file NIHMS1558796-supplement-Supp2.pdf]

**Supplementary File 2.** Data from case reports of individuals with pathogenic variants in autism-associated genes

| <b>Autism gene</b> | <b>ID cases</b>                                                    | <b>Autism cases</b> | <b>Autism cases with comorbid ID</b> | <b>Autism cases without ID</b> | <b>Variant types in autism/ID cases</b>                          | <b>Ref.</b> |
|--------------------|--------------------------------------------------------------------|---------------------|--------------------------------------|--------------------------------|------------------------------------------------------------------|-------------|
| <i>ADNP</i>        | 11/11                                                              | 7/11                | 7/7                                  | 0/7                            | Unknown                                                          | [1]         |
|                    | Mild - 9/73<br>Moderate - 26/73<br>Severe - 38/73<br>TOTAL - 73/73 | 64/73               | 64/64                                | 0/64                           | Unknown                                                          | [2]         |
|                    | 1/1 - Severe                                                       | 1/1                 | 1/1                                  | 0/1                            | Nonsense                                                         | [3]         |
|                    | 36/36                                                              | 29/36               | 29/29                                | 0/29                           | Missense - 1<br>Nonsense - 14<br>Frameshift - 13<br>Deletion - 1 | [4]         |
|                    | 13/13                                                              | 13/13               | 13/13                                | 0/13                           | Unknown                                                          | [5]         |
| <i>ANK2</i>        | 1/1 - Moderate (IQ=40-60)                                          | 1/1                 | 1/1                                  | 0/1                            | Frameshift                                                       | [6]         |
| <i>ANKRD11</i>     | Moderate - 6/7<br>Mild - 1/7<br>TOTAL - 7/7                        | 7/7                 | 7/7                                  | 0/7                            | Nonsense - 1<br>Frameshift - 3<br>Deletions - 3                  | [7]         |
|                    | 1/1                                                                | 1/1                 | 1/1                                  | 0/1                            | Frameshift                                                       | [8]         |
|                    | 2/2                                                                | 1/2                 | 1/1                                  | 0/1                            | Nonsense                                                         | [9]         |
| <i>ARID1B</i>      | 127/143                                                            | 77/143              | 77/77                                | 0/77                           | LOF - 118<br>Deletions - 18<br>Splice site - 7                   | [10]        |
|                    | 1/1 - Severe                                                       | 1/1                 | 1/1                                  | 0/1                            | Frameshift                                                       | [11]        |
|                    | 8/8 - Moderate/Severe                                              | 1/8                 | 1/1                                  | 0/1                            | Nonsense                                                         | [12]        |
|                    | 1/1                                                                | 1/1                 | 1/1                                  | 0/1                            | Frameshift                                                       | [13]        |

| <b>Autism gene</b> | <b>ID cases</b>                                                                                | <b>Autism cases</b>                                                                           | <b>Autism cases with comorbid ID</b> | <b>Autism cases without ID</b> | <b>Variant types in autism/ID cases</b> | <b>Ref.</b>                    |
|--------------------|------------------------------------------------------------------------------------------------|-----------------------------------------------------------------------------------------------|--------------------------------------|--------------------------------|-----------------------------------------|--------------------------------|
| <i>ASH1L</i>       | 6/13 - Mild<br>5/13 - Severe<br>2/13 - Yes<br>TOTAL - 13/13                                    | 3/13                                                                                          | 3/3                                  | 0/3                            | Nonsense - 2<br>Frameshift - 1          | [14]                           |
|                    | 1/1 - IQ<30                                                                                    | 1/1                                                                                           | 1/1                                  | 0/1                            | Missense                                | [15]                           |
| <i>ASXL3</i>       | 1/1                                                                                            | 1/1                                                                                           | 1/1                                  | 0/1                            | Nonsense                                | [16]                           |
|                    | 3/12 - Moderate<br>1/12 - Moderate-Severe<br>6/12 - Severe<br>1/12 - Profound<br>TOTAL - 11/12 | 9/12                                                                                          | 8/9                                  | 1/9                            | Nonsense - 6<br>Frameshift - 2          | [17]                           |
|                    | 1/1 - Severe                                                                                   | 1/1                                                                                           | 1/1                                  | 0/1                            | Frameshift                              | [18]                           |
|                    | 1/1 - Profound                                                                                 | 1/1                                                                                           | 1/1                                  | 0/1                            | Frameshift                              | [19]                           |
|                    | 2/2 - Severe                                                                                   | 2/2                                                                                           | 2/2                                  | 0/2                            | Nonsense - 2                            | [20]                           |
|                    | 1/1                                                                                            | 1/1                                                                                           | 1/1                                  | 0/1                            | Biallelic Missense                      | [21]                           |
|                    | 1/1                                                                                            | 1/1                                                                                           | 1/1                                  | 0/1                            | Frameshift                              | [22]                           |
|                    | <i>BCL11A</i>                                                                                  | 1/9 - Mild-Moderate<br>1/9 - Moderate-Severe<br>6/9 - Moderate<br>1/9 - Severe<br>TOTAL - 9/9 | 2/9                                  | 2/2                            | 0/2                                     | Missense - 1<br>Frameshift - 1 |
| 2/7                |                                                                                                | 2/7                                                                                           | 1/2                                  | 1/2                            | Missense                                | [24]                           |
| <i>CHD2</i>        | 1/1                                                                                            | 1/1                                                                                           | 1/1                                  | 0/1                            | Frameshift                              | [25]                           |
|                    | 2/2                                                                                            | 2/2                                                                                           | 2/2                                  | 0/2                            | Nonsense - 1<br>Splicing - 2            | [26]                           |

| Autism gene  | ID cases                                                                                           | Autism cases | Autism cases with comorbid ID | Autism cases without ID | Variant types in autism/ID cases                                | Ref. |
|--------------|----------------------------------------------------------------------------------------------------|--------------|-------------------------------|-------------------------|-----------------------------------------------------------------|------|
| <i>CHD8</i>  | 1/10 - Mild<br>3/10 - Moderate<br>1/10 - Moderate-Severe<br>2/10 - Severe<br>TOTAL - 7/10          | 7/10         | 6/7                           | 1/7                     | Nonsense - 4<br>Splicing - 1<br>Frameshift - 1                  | [27] |
|              | 7/10                                                                                               | 9/10         | 6/9                           | 3/9                     | Missense - 2<br>Nonsense - 4                                    | [28] |
|              | 11/11                                                                                              | 6/11         | 6/6                           | 0/6                     | Unknown                                                         | [1]  |
|              | 1/2 - Severe<br>1/2 - IQ=33<br>TOTAL - 2/2                                                         | 2/2          | 2/2                           | 0/2                     | Frameshift - 2                                                  | [15] |
|              | 11/17                                                                                              | 14/17        | 9/14                          | 5/14                    | Deletion - 1<br>Nonsense - 1<br>Splicing - 1<br>Frameshift - 3  | [29] |
|              | 9/15                                                                                               | 13/15        | 8/13                          | 5/13                    | Nonsense - 4<br>Splicing - 1<br>Frameshift - 3                  | [30] |
|              | 1/10 - Below average IQ<br>1/10 - Mild<br>3/10 - Low IQ<br>4/10 - Extremely low IQ<br>TOTAL - 9/10 | 10/10        | 9/10                          | 1/10                    | Deletions - 1<br>Nonsense - 3<br>Splicing - 1<br>Frameshift - 4 | [31] |
| <i>CUL3</i>  | 1/1 - Mild                                                                                         | 1/1          | 1/1                           | 0/1                     | Missense                                                        | [32] |
| <i>DDX3X</i> | 69/69                                                                                              | 27/69        | 27/27                         | 0/27                    | Unknown                                                         | [33] |
|              | 28/28                                                                                              | 6/28         | 6/6                           | 0/6                     | Unknown                                                         | [34] |

| Autism gene   | ID cases                                                           | Autism cases | Autism cases with comorbid ID | Autism cases without ID | Variant types in autism/ID cases                | Ref. |
|---------------|--------------------------------------------------------------------|--------------|-------------------------------|-------------------------|-------------------------------------------------|------|
| <i>DYRK1A</i> | 6/6                                                                | 6/6          | 6/6                           | 0/6                     | Nonsense - 2<br>Frameshift - 4                  | [35] |
|               | 1/20                                                               | 3/20         | 1/3                           | 2/3                     | Nonsense                                        | [36] |
| <i>KMT2A</i>  | 5/6                                                                | 5/6          | 4/5                           | 1/5                     | Missense - 1<br>Nonsense - 1<br>Frameshift - 2  | [37] |
|               | 0/2                                                                | 1/2          | 0/1                           | 1/1                     | Splicing - 1                                    | [38] |
|               | 18/33 - Mild<br>11/33 - Moderate<br>4/33 - Severe<br>TOTAL - 33/33 | 2/33         | 2/2                           | 0/2                     | Missense - 2                                    | [39] |
|               | 38/58                                                              | 4/58         | 4/4                           | 0/4                     | Unknown                                         | [40] |
| <i>MECP2</i>  | 1/1                                                                | 1/1          | 1/1                           | 0/1                     | Nonsense                                        | [41] |
| <i>MYT1L</i>  | 1/1 - IQ=60                                                        | 1/1          | 1/1                           | 0/1                     | Nonsense                                        | [15] |
| <i>NRXN1</i>  | 11/11 - Severe                                                     | 1/11         | 1/1                           | 0/1                     | Bi-allelic/deletion                             | [42] |
|               | 8/21                                                               | 12/21        | 2/12                          | 10/12                   | Deletions - 2                                   | [43] |
|               | 25/27                                                              | 20/27        | 19/20                         | 1/20                    | Deletions - 19                                  | [44] |
|               | 1/1                                                                | 1/1          | 1/1                           | 0/1                     | Deletion                                        | [45] |
| <i>POGZ</i>   | 9/10                                                               | 5/10         | 5/5                           | 0/5                     | Missense - 1<br>Nonsense - 3<br>Duplication - 1 | [46] |
|               | 1/1                                                                | 1/1          | 1/1                           | 0/1                     | Missense                                        | [47] |
|               | 1/1                                                                | 1/1          | 1/1                           | 0/1                     | LOF                                             | [48] |
|               | 1/1 - Severe                                                       | 1/1          | 1/1                           | 0/1                     | Frameshift                                      | [49] |
|               | 24/25                                                              | 17/23        | 17/17                         | 0/17                    | Intronic - 2<br>Nonsense - 7<br>Frameshift - 8  | [50] |

| Autism gene    | ID cases                                                               | Autism cases | Autism cases with comorbid ID | Autism cases without ID | Variant types in autism/ID cases                                | Ref. |
|----------------|------------------------------------------------------------------------|--------------|-------------------------------|-------------------------|-----------------------------------------------------------------|------|
| <i>POGZ</i>    | 5/5                                                                    | 2/5          | 2/2                           | 0/2                     | Nonsense - 1<br>Frameshift - 1                                  | [51] |
|                | 6/6                                                                    | 1/7          | 1/1                           | 0/1                     | Nonsense                                                        | [52] |
|                | 1/1 - Severe                                                           | 1/1          | 1/1                           | 0/1                     | Missense                                                        | [53] |
| <i>SCN2A</i>   | 1/1                                                                    | 1/1          | 1/1                           | 0/1                     | Deletion                                                        | [54] |
|                | 1/1                                                                    | 1/1          | 1/1                           | 0/1                     | Missense                                                        | [55] |
|                | 1/1 - Severe                                                           | 1/1          | 1/1                           | 0/1                     | Missense                                                        | [56] |
|                | 1/1                                                                    | 1/1          | 1/1                           | 0/1                     | Splicing                                                        | [57] |
|                | 15/33                                                                  | 5/33         | 3/5                           | 2/5                     | Missense - 2<br>Nonsense - 1                                    | [58] |
| <i>SETD5</i>   | 8/9                                                                    | 2/9          | 2/2                           | 0/2                     | Intronic - 1<br>Nonsense - 1                                    | [59] |
|                | 7/7                                                                    | 5/7          | 5/5                           | 0/5                     | Unknown                                                         | [60] |
| <i>SHANK3</i>  | 29/30                                                                  | 22/30        | 21/22                         | 1/22                    | Missense - 1<br>Splicing - 2<br>Nonsense - 4<br>Frameshift - 14 | [61] |
|                | 0/1                                                                    | 1/1          | 0/1                           | 1/1                     | Frameshift                                                      | [62] |
|                | 1/1                                                                    | 1/1          | 1/1                           | 0/1                     | Frameshift                                                      | [63] |
|                | 5/5                                                                    | 2/5          | 2/2                           | 0/2                     | Unknown                                                         | [64] |
| <i>SYNGAP1</i> | 1/1 - Moderate                                                         | 1/1          | 1/1                           | 0/1                     | Frameshift                                                      | [65] |
|                | 1/8 - Moderate<br>6/8 - Moderate/Severe<br>1/8 - Severe<br>TOTAL - 8/8 | 3/8          | 3/3                           | 0/3                     | Missense - 2<br>Frameshift - 1                                  | [66] |
|                | 1/1                                                                    | 1/1          | 1/1                           | 0/1                     | Splicing                                                        | [67] |
|                | 1/1 - Mild                                                             | 1/1          | 1/1                           | 0/1                     | Missense                                                        | [68] |
|                | 1/1 - Severe                                                           | 1/1          | 1/1                           | 0/1                     | Splicing                                                        | [69] |

| <b>Autism gene</b> | <b>ID cases</b>                                                                                | <b>Autism cases</b> | <b>Autism cases with comorbid ID</b> | <b>Autism cases without ID</b> | <b>Variant types in autism/ID cases</b>                        | <b>Ref.</b> |
|--------------------|------------------------------------------------------------------------------------------------|---------------------|--------------------------------------|--------------------------------|----------------------------------------------------------------|-------------|
| <i>SYNGAP1</i>     | 1/11 - Mild<br>6/11 - Moderate<br>4/11 - Moderate/Severe<br>TOTAL - 11/11                      | 4/11                | 4/4                                  | 0/4                            | Missense - 2<br>Splicing - 1<br>Frameshift - 1                 | [70]        |
| <i>TCF20</i>       | 16/16                                                                                          | 9/16                | 9/9                                  | 0/9                            | Missense - 1<br>Nonsense - 1<br>Deletion - 3<br>Frameshift - 4 | [71]        |
|                    | 26/26                                                                                          | 18/26               | 18/18                                | 0/18                           | Unknown                                                        | [72]        |
|                    | 1/5 - borderline (IQ=79)<br>2/5 - Mild<br>1/5 - Mild-Moderate<br>1/5 - Moderate<br>TOTAL - 5/6 | 5/6                 | 4/5                                  | 1/5                            | Rearrangement - 2<br>Frameshift - 2                            | [73]        |

## References

- 1 Arnett AB, Rhoads CL, Hoekzema K, *et al.* The autism spectrum phenotype in ADNP syndrome. *Autism Res* 2018;**11**:1300–10. doi:10.1002/aur.1980
- 2 Van Dijck A, Vulto-van Silfhout AT, Cappuyns E, *et al.* Clinical Presentation of a Complex Neurodevelopmental Disorder Caused by Mutations in ADNP. *Biol Psychiatry* 2019;**85**:287–97. doi:10.1016/j.biopsych.2018.02.1173
- 3 Alkhunaizi E, Walkiewicz MA, Chitayat D. Mutation in the ADNP gene associated with Noonan syndrome features. *Clin Dysmorphol* 2018;**27**:53–7. doi:10.1097/MCD.0000000000000215
- 4 Gozes I, Van Dijck A, Hacoheh-Kleiman G, *et al.* Premature primary tooth eruption in cognitive/motor-delayed ADNP-mutated children. *Transl Psychiatry* 2017;**7**. doi:10.1038/tp.2017.27
- 5 Krajewska-Walasek M, Jurkiewicz D, Piekutowska-Abramczuk D, *et al.* Additional data on the clinical phenotype of Helsmoortel-Van der Aa syndrome associated with a novel truncating mutation in ADNP gene. *Am J Med Genet Part A* 2016;**170**:1647–50. doi:10.1002/ajmg.a.37641
- 6 Bowling KM, Thompson ML, Amaral MD, *et al.* Genomic diagnosis for children with intellectual disability and/or developmental delay. *Genome Med* 2017;**9**. doi:10.1186/s13073-017-0433-1
- 7 Sirmaci A, Spiliopoulos M, Brancati F, *et al.* Mutations in ANKRD11 cause KBG syndrome, characterized by intellectual disability, skeletal malformations, and macrodontia. *Am J Hum Genet* 2011;**89**:289–94. doi:10.1016/j.ajhg.2011.06.007
- 8 Kleyner R, Malcolmson J, Tegay D, *et al.* KBG syndrome involving a single-nucleotide duplication in ANKRD11. *Cold Spring Harb Mol Case Stud* 2016;**2**:a001131. doi:10.1101/mcs.a001131
- 9 Parenti I, Gervasini C, Pozojevic J, *et al.* Broadening of cohesinopathies: Exome sequencing identifies mutations in ANKRD11 in two patients with Cornelia de Lange-overlapping phenotype. *Clin Genet* 2016;**89**:74–81. doi:10.1111/cge.12564
- 10 van der Sluijs PJ, Jansen S, Vergano SA, *et al.* The ARID1B spectrum in 143 patients: from nonsyndromic intellectual disability to Coffin–Siris syndrome. *Genet Med* 2019;**21**:1295–307. doi:10.1038/s41436-018-0330-z
- 11 Määttänen L, Hietala M, Ignatius J, *et al.* A 69-year-old woman with Coffin–Siris syndrome. *Am J Med Genet Part A* 2018;**176**:1764–7. doi:10.1002/ajmg.a.38844
- 12 Hoyer J, Ekici AB, Ende S, *et al.* Haploinsufficiency of ARID1B, a member of the SWI/SNF-A chromatin-remodeling complex, is a frequent cause of intellectual disability. *Am J Hum Genet* 2012;**90**:565–72. doi:10.1016/j.ajhg.2012.02.007
- 13 Vals MA, Öglane-Shlik E, Nõukas M, *et al.* Coffin-Siris Syndrome with obesity, macrocephaly, hepatomegaly and hyperinsulinism caused by a mutation in the ARID1B gene. *Eur J Hum Genet* 2014;**22**:1327–9. doi:10.1038/ejhg.2014.25

- 14 Shen W, Krautscheid P, Rutz AM, *et al.* De novo loss-of-function variants of ASXL1 are associated with an emergent neurodevelopmental disorder. *Eur J Med Genet* 2019;**62**:55–60. doi:10.1016/j.ejmg.2018.05.003
- 15 Wang T, Guo H, Xiong B, *et al.* De novo genic mutations among a Chinese autism spectrum disorder cohort. *Nat Commun* 2016;**7**:13316. doi:10.1038/ncomms13316
- 16 Wayhelova M, Oppelt J, Smetana J, *et al.* Novel de novo frameshift variant in the ASXL3 gene in a child with microcephaly and global developmental delay. *Mol Med Rep* 2019;**20**:505–12. doi:10.3892/mmr.2019.10303
- 17 Balasubramanian M, Willoughby J, Fry AE, *et al.* Delineating the phenotypic spectrum of Bainbridge-Ropers syndrome: 12 new patients with de novo, heterozygous, loss-of-function mutations in ASXL3 and review of published literature. *J Med Genet* 2017;**54**:537–43. doi:10.1136/jmedgenet-2016-104360
- 18 Verhoeven W, Egger J, Räkens E, *et al.* Phenotypic characterization of an older adult male with late-onset epilepsy and a novel mutation in ASXL3 shows overlap with the associated Bainbridge-Ropers syndrome. *Neuropsychiatr Dis Treat* 2018;**14**:867–70. doi:10.2147/NDT.S153511
- 19 Chinen Y, Nakamura S, Ganaha A, *et al.* Mild prominence of the Sylvian fissure in a Bainbridge-Ropers syndrome patient with a novel frameshift variant in ASXL3. *Clin Case Reports* 2018;**6**:330–6. doi:10.1002/ccr3.1361
- 20 Koboldt DC, Mosher TM, Kelly BJ, *et al.* A de novo nonsense mutation in ASXL3 shared by siblings with Bainbridge-Ropers syndrome. *Cold Spring Harb Mol Case Stud* 2018;**4**. doi:10.1101/mcs.a002410
- 21 Giri D, Rigden D, Didi M, *et al.* Novel compound heterozygous ASXL3 mutation causing Bainbridge-ropers like syndrome and primary IGF1 deficiency. *Int J Pediatr Endocrinol* 2017;**2017**. doi:10.1186/s13633-017-0047-9
- 22 Dinwiddie DL, Soden SE, Saunders CJ, *et al.* De novo frameshift mutation in ASXL3 in a patient with global developmental delay, microcephaly, and craniofacial anomalies. *BMC Med Genomics* 2013;**6**:32. doi:10.1186/1755-8794-6-32
- 23 Dias C, Estruch SB, Graham SA, *et al.* BCL11A Haploinsufficiency Causes an Intellectual Disability Syndrome and Dysregulates Transcription. *Am J Hum Genet* 2016;**99**:253–74. doi:10.1016/j.ajhg.2016.05.030
- 24 Cai T, Chen X, Li J, *et al.* Identification of novel mutations in the HbF repressor gene BCL11A in patients with autism and intelligence disabilities. *Am J Hematol* 2017;**92**:E653–6. doi:10.1002/ajh.24902
- 25 Bernardo P, Galletta D, Iasevoli F, *et al.* CHD2 mutations: Only epilepsy? Description of cognitive and behavioral profile in a case with a new mutation. *Seizure* 2017;**51**:186–9. doi:10.1016/j.seizure.2017.09.001
- 26 Yamamoto T, Imaizumi T, Yamamoto-Shimajima K, *et al.* Genomic backgrounds



- of Japanese patients with undiagnosed neurodevelopmental disorders. *Brain Dev* 2019;**41**:776–82. doi:10.1016/j.braindev.2019.05.007
- 27 Douzgou S, Liang HW, Metcalfe K, *et al.* The clinical presentation caused by truncating CHD8 variants. *Clin Genet* 2019;**96**:72–84. doi:10.1111/cge.13554
- 28 Wang J, Liu J, Gao Y, *et al.* Autism spectrum disorder early in development associated with CHD8 mutations among two Chinese children. *BMC Pediatr* 2018;**18**:338. doi:10.1186/s12887-018-1307-4
- 29 Stolerman ES, Smith B, Chaubey A, *et al.* CHD8 intragenic deletion associated with autism spectrum disorder. *Eur J Med Genet* 2016;**59**:189–94. doi:10.1016/j.ejmg.2016.02.010
- 30 Bernier R, Golzio C, Xiong B, *et al.* Disruptive CHD8 Mutations Define a Subtype of Autism Early in Development. *Cell* 2014;**158**:263–76. doi:10.1016/j.cell.2014.06.017
- 31 Merner N, Forgeot d’Arc B, Bell SC, *et al.* A de novo frameshift mutation in chromodomain helicase DNA-binding domain 8 (CHD8): A case report and literature review. *Am J Med Genet A* 2016;**170A**:1225–35. doi:10.1002/ajmg.a.37566
- 32 Codina-Solà M, Rodríguez-Santiago B, Homs A, *et al.* Integrated analysis of whole-exome sequencing and transcriptome profiling in males with autism spectrum disorders. *Mol Autism* 2015;**6**:21. doi:10.1186/s13229-015-0017-0
- 33 Chanes NM, Wong J, Lacassie Y. Further delineation of DDX3X syndrome. *Clin Dysmorphol* 2019;**28**:151–3. doi:10.1097/MCD.0000000000000263
- 34 Wang X, Posey JE, Rosenfeld JA, *et al.* Phenotypic expansion in DDX3X - a common cause of intellectual disability in females. *Ann Clin Transl Neurol* 2018;**5**:1277–85. doi:10.1002/acn3.622
- 35 Blackburn ATM, Bekheirnia N, Uma VC, *et al.* DYRK1A-related intellectual disability: a syndrome associated with congenital anomalies of the kidney and urinary tract. *Genet Med* 2019;**21**:2755–64. doi:10.1038/s41436-019-0576-0
- 36 Evers JMG, Laskowski RA, Bertolli M, *et al.* Structural analysis of pathogenic mutations in the DYRK1A gene in patients with developmental disorders. *Hum Mol Genet* 2017;**26**:519–26. doi:10.1093/hmg/ddw409
- 37 Chan AJS, Cytrynbaum C, Hoang N, *et al.* Expanding the neurodevelopmental phenotypes of individuals with de novo KMT2A variants. *npj Genomic Med* 2019;**4**:9. doi:10.1038/s41525-019-0083-x
- 38 Feldman HR, Dlouhy SR, Lah MD, *et al.* The progression of Wiedemann-Steiner syndrome in adulthood and two novel variants in the KMT2A gene. *Am J Med Genet A* 2019;**179**:300–5. doi:10.1002/ajmg.a.60698
- 39 Baer S, Afenjar A, Smol T, *et al.* Wiedemann-Steiner syndrome as a major cause of syndromic intellectual disability: A study of 33 French cases. *Clin Genet*

- 2018;**94**:141–52. doi:10.1111/cge.13254
- 40 Sun Y, Hu G, Liu H, *et al.* Further delineation of the phenotype of truncating KMT2A mutations: The extended Wiedemann-Steiner syndrome. *Am J Med Genet A* 2017;**173**:510–4. doi:10.1002/ajmg.a.38025
- 41 Alexandrou A, Papaevripidou I, Alexandrou IM, *et al.* De novo mosaic MECP2 mutation in a female with Rett syndrome. *Clin Case Reports* 2019;**7**:366–70. doi:10.1002/ccr3.1985
- 42 Castronovo P, Baccarin M, Ricciardello A, *et al.* Phenotypic spectrum of NRXN1 mono- and bi-allelic deficiency: A systematic review. *Clin Genet* 2020;**97**:125–37. doi:10.1111/cge.13537
- 43 Brignell A, St John M, Boys A, *et al.* Characterization of speech and language phenotype in children with NRXN1 deletions. *Am J Med Genet B Neuropsychiatr Genet* 2018;**177**:700–8. doi:10.1002/ajmg.b.32664
- 44 Al Shehhi M, Forman EB, Fitzgerald JE, *et al.* NRXN1 deletion syndrome; phenotypic and penetrance data from 34 families. *Eur J Med Genet* 2019;**62**:204–9. doi:10.1016/j.ejmg.2018.07.015
- 45 Sajid U, Argiropoulos B, Wei X-C, *et al.* Two De Novo Mutations in an Autistic Child Who Had Previously Undergone Transplantation for Dilated Cardiomyopathy: The Importance of Keeping an Open Mind. *Can J Cardiol* 2017;**33**:292.e5-292.e7. doi:10.1016/j.cjca.2016.08.019
- 46 Ferretti A, Barresi S, Trivisano M, *et al.* POGZ-related epilepsy: Case report and review of the literature. *Am J Med Genet A* 2019;**179**:1631–6. doi:10.1002/ajmg.a.61206
- 47 Samanta D, Ramakrishnaiah R, Schaefer B. The neurological aspects related to POGZ mutation: case report and review of CNS malformations and epilepsy. *Acta Neurol. Belg.* 2019. doi:10.1007/s13760-019-01122-6
- 48 Du X, Gao X, Liu X, *et al.* Genetic Diagnostic Evaluation of Trio-Based Whole Exome Sequencing Among Children With Diagnosed or Suspected Autism Spectrum Disorder. *Front Genet* 2018;**9**. doi:10.3389/fgene.2018.00594
- 49 Dentici ML, Niceta M, Pantaleoni F, *et al.* Expanding the phenotypic spectrum of truncating POGZ mutations: Association with CNS malformations, skeletal abnormalities, and distinctive facial dysmorphism. *Am J Med Genet A* 2017;**173**:1965–9. doi:10.1002/ajmg.a.38255
- 50 Stessman HAF, Willemsen MH, Fenckova M, *et al.* Disruption of POGZ Is Associated with Intellectual Disability and Autism Spectrum Disorders. *Am J Hum Genet* 2016;**98**:541–52. doi:10.1016/j.ajhg.2016.02.004
- 51 White J, Beck CR, Harel T, *et al.* POGZ truncating alleles cause syndromic intellectual disability. *Genome Med* 2016;**8**. doi:10.1186/s13073-015-0253-0
- 52 Ye Y, Cho MT, Retterer K, *et al.* De novo POGZ mutations are associated with

- neurodevelopmental disorders and microcephaly . *Mol Case Stud* 2015;**1**:a000455. doi:10.1101/mcs.a000455
- 53 Fukai R, Hiraki Y, Yofune H, *et al.* A case of autism spectrum disorder arising from a de novo missense mutation in POGZ. *J Hum Genet* 2015;**60**:277–9. doi:10.1038/jhg.2015.13
- 54 Nickel K, Tebartz van Elst L, Domschke K, *et al.* Heterozygous deletion of SCN2A and SCN3A in a patient with autism spectrum disorder and Tourette syndrome: a case report. *BMC Psychiatry* 2018;**18**:248. doi:10.1186/s12888-018-1822-8
- 55 Leach EL, van Karnebeek CDM, Townsend KN, *et al.* Episodic ataxia associated with a de novo SCN2A mutation. *Eur J Paediatr Neurol* 2016;**20**:772–6. doi:10.1016/j.ejpn.2016.05.020
- 56 Wong VCN, Fung CW, Kwong AKY. SCN2A mutation in a Chinese boy with infantile spasm - response to Modified Atkins Diet. *Brain Dev* 2015;**37**:729–32. doi:10.1016/j.braindev.2014.10.008
- 57 Tavassoli T, Kolevzon A, Wang AT, *et al.* De novo SCN2A splice site mutation in a boy with Autism spectrum disorder. *BMC Med Genet* 2014;**15**:35. doi:10.1186/1471-2350-15-35
- 58 Baasch AL, Hüning I, Gilissen C, *et al.* Exome sequencing identifies a de novo SCN2A mutation in a patient with intractable seizures, severe intellectual disability, optic atrophy, muscular hypotonia, and brain abnormalities. *Epilepsia* 2014;**55**. doi:10.1111/epi.12554
- 59 Powis Z, Farwell Hagman KD, Mroske C, *et al.* Expansion and further delineation of the SETD5 phenotype leading to global developmental delay, variable dysmorphic features, and reduced penetrance. *Clin Genet* 2018;**93**:752–61. doi:10.1111/cge.13132
- 60 Grozeva D, Carss K, Spasic-Boskovic O, *et al.* De novo loss-of-function mutations in SETD5, encoding a methyltransferase in a 3p25 microdeletion syndrome critical region, cause intellectual disability. *Am J Hum Genet* 2014;**94**:618–24. doi:10.1016/j.ajhg.2014.03.006
- 61 Li Y, Jia X, Wu H, *et al.* Genotype and phenotype correlations for SHANK3 de novo mutations in neurodevelopmental disorders. *Am J Med Genet Part A* 2018;**176**:2668–76. doi:10.1002/ajmg.a.40666
- 62 Kanani F, Study D, Balasubramanian M. SHANK3 variant as a cause of nonsyndromal autism in an 11-year-old boy and a review of published literature. *Clin Dysmorphol* 2018;**27**:113–5. doi:10.1097/MCD.0000000000000232
- 63 Zhu W, Li J, Chen S, *et al.* Two de novo novel mutations in one SHANK3 allele in a patient with autism and moderate intellectual disability. *Am J Med Genet A* 2018;**176**:973–9. doi:10.1002/ajmg.a.38622
- 64 Terrone G, Vitiello G, Genesio R, *et al.* A novel SHANK3 interstitial microdeletion in a family with intellectual disability and brain MRI abnormalities resembling

- Unidentified Bright Objects. *Eur J Paediatr Neurol* 2017;**21**:902–6. doi:10.1016/j.ejpn.2017.07.006
- 65 Cook EH, Masaki JT, Guter SJ, *et al.* Lovastatin Treatment of a Patient with a De Novo SYNGAP1 Protein Truncating Variant. *J Child Adolesc Psychopharmacol* 2019;**29**:321–2. doi:10.1089/cap.2018.0159
- 66 von Stülpnagel C, Hartlieb T, Borggräfe I, *et al.* Chewing induced reflex seizures ('eating epilepsy') and eye closure sensitivity as a common feature in pediatric patients with SYNGAP1 mutations: Review of literature and report of 8 cases. *Seizure* 2019;**65**:131–7. doi:10.1016/j.seizure.2018.12.020
- 67 Pei Y, Li W, Du L, *et al.* Novel Mutation of SYNGAP1 Associated with Autosomal Dominant Mental Retardation 5 in a Chinese Patient. *Fetal Pediatr Pathol* 2018;**37**:400–3. doi:10.1080/15513815.2018.1497113
- 68 Kimura Y, Akahira-Azuma M, Harada N, *et al.* Novel SYNGAP1 variant in a patient with intellectual disability and distinctive dysmorphisms. *Congenit Anom (Kyoto)* 2018;**58**:188–90. doi:10.1111/cga.12273
- 69 Prchalova D, Havlovicova M, Sterbova K, *et al.* Analysis of 31-year-old patient with SYNGAP1 gene defect points to importance of variants in broader splice regions and reveals developmental trajectory of SYNGAP1-associated phenotype: case report. *BMC Med Genet* 2017;**18**:62. doi:10.1186/s12881-017-0425-4
- 70 Berryer MH, Hamdan FF, Klitten LL, *et al.* Mutations in SYNGAP1 cause intellectual disability, autism, and a specific form of epilepsy by inducing haploinsufficiency. *Hum Mutat* 2013;**34**:385–94. doi:10.1002/humu.22248
- 71 Vetrini F, McKee S, Rosenfeld JA, *et al.* De novo and inherited TCF20 pathogenic variants are associated with intellectual disability, dysmorphic features, hypotonia, and neurological impairments with similarities to Smith–Magenis syndrome. *Genome Med* 2019;**11**:12. doi:10.1186/s13073-019-0623-0
- 72 Torti E, Keren B, Palmer EE, *et al.* Variants in TCF20 in neurodevelopmental disability: description of 27 new patients and review of literature. *Genet Med* 2019;**21**:2036–42. doi:10.1038/s41436-019-0454-9
- 73 Schäffgen J, Cremer K, Becker J, *et al.* De novo nonsense and frameshift variants of TCF20 in individuals with intellectual disability and postnatal overgrowth. *Eur J Hum Genet* 2016;**24**:1739–45. doi:10.1038/ejhg.2016.90
